1 Genome-wide DNA methylation profiles in smoking discordant  
2 and concordant monozygotic twin pairs

3

4 Jenny van Dongen<sup>1,2,3</sup>, Gonneke Willemsen<sup>1,2</sup>, BIOS Consortium<sup>4</sup>, Eco J.C. de Geus<sup>1,2</sup>,

5 Dorret I. Boomsma<sup>1,2,3</sup>, Michael C. Neale<sup>5</sup>

6

7 <sup>1</sup>Department of Biological Psychology, Vrije Universiteit Amsterdam, Amsterdam, The Netherlands

8 <sup>2</sup>Amsterdam Public Health Research Institute, Amsterdam, The Netherlands

9 <sup>3</sup>Amsterdam Reproduction and Development (AR&D) Research Institute, Amsterdam, The

10 Netherlands

11 <sup>4</sup>Biobank-based Integrative Omics Study Consortium

12 <sup>5</sup>Virginia Institute for Psychiatric and Behavioral Genetics, Virginia Commonwealth University, Richmond,

13 USA

14

15

16 Corresponding author: Jenny van Dongen, Ph.D., Department of Biological Psychology, Vrije

17 Universiteit Amsterdam, van der Boechorststraat 7, 1081 BT Amsterdam, Amsterdam,

18 Netherlands, tel: +31 (20) 5983570, [j.van.dongen@vu.nl](mailto:j.van.dongen@vu.nl).

19

20

21

22

23

24

25

26 **Abstract**

27 Smoking-associated DNA methylation levels identified through epigenome-wide association  
28 studies (EWAS) are generally ascribed to smoking-reactive mechanisms, but the contribution  
29 of a shared genetic predisposition to smoking and DNA methylation levels is typically not  
30 accounted for. We exploited a strong within-family design, i.e., the discordant monozygotic  
31 twin design, to study reactivity of DNA methylation in blood cells to smoking and  
32 reversibility of methylation patterns upon quitting smoking. Illumina HumanMethylation450  
33 BeadChip data were available for 769 monozygotic twin pairs (mean age=36  
34 years, range=18-78, 70% female), including pairs discordant or concordant for current or  
35 former smoking. In pairs discordant for current smoking, 13 differentially methylated CpGs  
36 were found between current smoking twins and their genetically identical co-twin who never  
37 smoked. Top sites include multiple CpGs in *CACNA1D* and *GNG12*, which encode subunits  
38 of a calcium voltage-gated channel and G protein, respectively. These proteins interact with  
39 the nicotinic acetylcholine receptor, suggesting that methylation levels at these CpGs might  
40 be reactive to nicotine exposure. All 13 CpGs have been previously associated with smoking  
41 in unrelated individuals and data from monozygotic pairs discordant for former smoking  
42 indicated that methylation patterns are to a large extent reversible upon smoking cessation.  
43 We further showed that differences in smoking level exposure for monozygotic twins who are  
44 both current smokers but differ in the number of cigarettes they smoke are reflected in their  
45 DNA methylation profiles. In conclusion, by analysing data from monozygotic twins, we  
46 robustly demonstrate that DNA methylation level in human blood cells is reactive to cigarette  
47 smoking.

48

49 **Key words:** Cigarettes, EWAS, twin study, addiction, causality, epigenetic, smoke,  
50 Netherlands Twin Register

51

## 52 **Background**

53 Epigenome-wide association studies (EWAS) have identified robust differences in DNA  
54 methylation between smokers and non-smokers[1]. In a meta-analysis of blood-based DNA  
55 methylation studies (N=15,907 individuals; the largest EWAS of smoking to date), 2,623 CpG  
56 sites passed the Bonferroni threshold for genome-wide significance in a comparison of  
57 current and never smokers[2]. Based on comparison with loci identified in large genome-wide  
58 association studies (GWAS), differentially methylated sites were significantly enriched in  
59 genes implicated in well-established smoking-associated diseases, such as cancer,  
60 cardiovascular disease, inflammatory disease and lung disease, as well as in genes  
61 associated with schizophrenia and educational attainment[2]. It has been hypothesized that  
62 smoking-induced methylation changes might also contribute to the addictive effect of  
63 smoking[3].

64 Importantly, smoking-associated DNA methylation levels, as established in human EWA  
65 studies, may reflect different mechanisms. They may reflect causal effects of smoking on  
66 methylation, causal effects of methylation on smoking behaviour, methylation differences  
67 associated with epiphenomena of other exposures that correlate with smoking (e.g. alcohol  
68 use[4]), or they may reflect a shared genetic predisposition to smoking and methylation level.  
69 To distinguish these different mechanisms requires incisive study designs[5]. Establishing  
70 whether methylation levels in smokers revert to levels of never smokers upon smoking  
71 cessation is a first step. A previous study of 2,648 former smokers with cross-sectional  
72 methylation data from the Framingham Heart Study suggested that methylation levels at  
73 most CpGs return to the level of never smokers within five years after quitting smoking, but  
74 36 CpGs were still differentially methylated in former smokers, who had quit smoking for 30  
75 years[2]. In the large EWAS meta-analysis of smoking[2], 185 CpGs were differentially  
76 methylated between former and never smokers (compared to 2623 between current and  
77 never smokers). In addition, differences between former and never smokers were smaller  
78 than between current and never smokers. Reversible DNA methylation patterns may suggest

79 that DNA methylation is reactive to smoking. However, it is also possible that the different  
80 methylation level in current smokers reflects a higher genetic liability to smoking behavior  
81 (that makes them more likely to initiate and keep smoking). Similarly, differences between  
82 former smokers and never smokers could reflect that smoking has caused a persistent  
83 methylation change but can also be driven by genetic factors.

84 In population-based studies, smoking cases and non-smoking individuals may differ on many  
85 aspects, including their genetic predisposition to smoking. On the other hand, monozygotic  
86 twins are genetically identical (except for *de novo* mutations, but these are rare[6,7]), and are  
87 matched on sex, age and early environment. They have been exposed to similar prenatal  
88 conditions, which may include second hand smoke from smoking mothers and others.

89 Therefore, smoking discordant monozygotic twin pairs offer a unique opportunity to assess  
90 smoking-reactive DNA methylation patterns[5,8]. Despite the large number of previous  
91 population-based smoking EWASs, only one previous study compared genome-wide DNA  
92 methylation in smoking discordant monozygotic twin pairs[9]. This study analysed whole  
93 blood Illumina 450k array methylation data from 20 discordant pairs, and reported 22 top loci,  
94 many of which had been previously associated with cigarette smoking in previous studies.  
95 However, following the correction for multiple testing, none of the differentially methylated  
96 loci were statistically significant, and this previous twin study did not examine reversibility of  
97 smoking effects, i.e., where methylation status changes again following smoking cessation.

98 Here, we analyse unique data from a large cohort of monozygotic twin pairs. This cohort is  
99 sufficiently large to include current smoking discordant and concordant pairs, as well as pairs  
100 discordant for former smoking. These groups allow identification of loci that are reactive to  
101 smoking, and examination of the extent to which effects are reversible upon quitting smoking.  
102 Monozygotic pairs in which both twins are current smokers, but who differ in quantity  
103 smoked, enable examination of the effects of smoking intensity. Finally, concordant pairs  
104 who never smoked allow assessment of the amount of DNA methylation variation at  
105 smoking-reactive loci that is due to non-genetic sources of variation other than smoking. In

106 secondary enrichment analyses, we examined whether smoking-reactive methylation  
107 patterns are enriched 1) at loci detected in previous epigenome-wide association studies of  
108 other traits and exposures, 2) at loci detected in a previous large Genome-wide Association  
109 Study meta-analysis of smoking initiation[10] – these loci are presumed to have a causal  
110 effect on smoking behaviour, and 3) within Gene Ontology and Kegg Pathways. Finally, we  
111 examined the relationship between DNA methylation and RNA transcript levels in blood for  
112 smoking-reactive loci.

113

114

115

116

117

118

119

120

121

122

123

124

125

126

127

128

## 129 **Methods**

### 130 **Participants**

131 In the Netherlands Twin Register (NTR), DNA methylation data are available for 3087 whole  
132 blood samples from 3055 individuals in twin families, as described in detail previously[11].  
133 The samples were obtained from twins and family members, who participated in NTR  
134 longitudinal survey studies[12] and the NTR biobank project[13]. In the current study,  
135 methylation data from monozygotic twin pairs were analysed. Among 768 monozygotic twin  
136 pairs with genome-wide methylation data and information on smoking and covariates, we  
137 identified the following discordant pairs: 53 discordant pairs, in which one twin was a current  
138 smoker at blood draw and the other never smoked, 72 discordant pairs, in which one twin  
139 was a former smoker at blood draw and the other never smoked, 66 discordant pairs of  
140 which one twin was a former smoker and the other a current smoker at blood draw. In  
141 addition, we identified the following concordant pairs: 83 twin pairs concordant for current  
142 smoking, 88 twin pairs concordant for former smoking, and 406 concordant twin pairs who  
143 never smoked. Informed consent was obtained from all participants. The study was approved  
144 by the Central Ethics Committee on Research Involving Human Subjects of the VU  
145 University Medical Centre, Amsterdam, an Institutional Review Board certified by the U.S.  
146 Office of Human Research Protections (IRB number IRB00002991 under Federal-wide  
147 Assurance- FWA00017598; IRB/institute codes, NTR 03-180).

### 148 **Peripheral blood DNA methylation and cell counts**

149 Genome-wide DNA methylation in whole blood was measured by the Human Genomics  
150 facility (HugeF) of ErasmusMC, the Netherlands (<http://www.glimdna.org/>). DNA methylation  
151 was assessed with the Infinium HumanMethylation450 BeadChip Kit (Illumina, San Diego,  
152 CA, USA). Genomic DNA (500 ng) from whole blood was bisulfite treated using the Zymo  
153 EZ DNA Methylation kit (Zymo Research Corp, Irvine, CA, USA), and 4 µl of bisulfite-  
154 converted DNA was measured on the Illumina 450k array[14] following the manufacturer's

155 protocol. A custom pipeline for quality control and normalization of the methylation data was  
156 developed by the BIOS consortium. First, sample quality control was performed using  
157 MethylAid[15]. Next, probe filtering was applied with DNAmArray[16] to remove: ambiguously  
158 mapped probes[17], probes with a detection  $P$  value  $> 0.01$ , or bead number  $< 3$ , or raw  
159 signal intensity of zero. After these probe filtering steps, probes and samples with a success  
160 rate  $< 95\%$  were removed. Next, the DNA methylation data were normalized using  
161 functional normalization[18], as implemented in DNAmArray[16] using the cohort-specific  
162 optimum number of control probe-based principal components. Probes containing a SNP,  
163 identified in a DNA sequencing project in the Dutch population[19], within the CpG site (at the  
164 C or G position) were excluded irrespective of minor allele frequency, and only autosomal  
165 probes were analysed, leading to a total number of 411,169 methylation sites. The following  
166 subtypes of white blood cells were counted in blood samples: neutrophils, lymphocytes,  
167 monocytes, eosinophils, and basophils[13].

168

## 169 **Smoking**

170 Information on smoking behavior was obtained by interview during the home visit for blood  
171 collection as part of the NTR biobank project (2004–2008 and 2010-2011). Participants were  
172 asked: “Did you ever smoke?”, with answer categories: (1) no, I never smoked (2) I’m a  
173 former smoker (3) yes. Current smokers were asked how many years they smoked and how  
174 many cigarettes per day they smoked, while ex-smokers were asked how many years ago  
175 they quit, for how many years they smoked and how many cigarettes per day they smoked.  
176 Data were checked for consistencies and missing data were completed by linking this  
177 information to data from surveys filled out close to the time of biobanking within the  
178 longitudinal survey study of the NTR. Pack-years were calculated as the (number of  
179 cigarettes smoked per day)/20  $\times$  number of years smoked.

180

## 181 **Statistical analyses**

## 182 ***Overview and hypotheses***

183 All analyses were performed in R[20]. Analyses were performed in six groups of monozygotic  
184 twin pairs (**Fig. 1**). To identify DNA methylation differences in smoking discordant  
185 monozygotic twin pairs, we first compared the twin pairs, in which one twin had never  
186 smoked, and the other was a current smoker at the time of blood sampling. Second, to  
187 identify which of these DNA methylation differences might be reversible, we analysed data  
188 from 1) monozygotic pairs in which one twin had never smoked, and the other was a former  
189 smoker at the time of blood sampling, 2) from monozygotic pairs in which one twin was a  
190 current smoker, and the other was a former smoker at the time of blood sampling, and 3)  
191 from monozygotic pairs who were both former smokers. Third, to quantify within-pair  
192 methylation differences that occur by chance alone, we compared the within-pair differences  
193 monozygotic twins concordant for never having smoked. Forth, data monozygotic twins  
194 concordant for current smoking were analysed to examine the effects of smoking intensity.  
195 Our hypotheses were as follows: 1) if DNA methylation level is reactive to cigarette smoking,  
196 methylation differences will be present between smokers and non-smokers after ruling out  
197 genetic differences, i.e. in smoking discordant monozygotic twins, and these differences will  
198 be larger than in monozygotic pairs concordant for never smoking, 2) if DNA methylation  
199 patterns are reversible upon quitting smoking, methylation differences ( $\Delta M$ ) in monozygotic  
200 pairs will show the following pattern:  $\Delta M$  discordant current-never >  $\Delta M$  discordant current-  
201 former and  $\Delta M$  discordant former-never >  $\Delta M$  concordant never, 3) a correlation between  
202 time since quitting smoking and  $\Delta M$  in pairs discordant for former smoking is consistent with  
203 a gradual reversibility of methylation levels upon quitting smoking, 4) a correlation between  
204  $\Delta M$  and the difference in number of cigarettes smoked per day in smoking concordant pairs  
205 is consistent with smoking-reactive methylation patterns that show a dose-response  
206 relationship with amount of cigarettes smoked.

207

## 208 ***Epigenome-wide association study***



209 In the entire data set of 3087 blood samples, we used linear regression analysis to correct  
210 the DNA methylation levels ( $\beta$  -values) for HM450k array row, bisulphite plate (dummy-  
211 coding) and white blood cell percentages (% neutrophils, % monocytes, and % eosinophils).  
212 White blood cell percentages were included to account for variation in cellular composition  
213 between whole blood samples. Lymphocyte percentage was not included in models because  
214 it was strongly correlated with neutrophil percentage ( $r = -0.93$ ), and basophil percentage  
215 was not included because it showed little variation between subjects, with a large number of  
216 subjects having 0% of basophils. We did not adjust for sex and age, because monozygotic  
217 twins have the same sex and age. The residuals from this regression analysis were used in  
218 the within-pair EWAS analyses. Specifically, the residuals were used as input for  
219 paired  $t$ -tests to compare the methylation of the smoking twins with that of their non-smoking  
220 co-twins. Similarly, paired  $t$ -tests were applied to data from smoking concordant pairs, and to  
221 test for differences in white blood cell profiles and smoking frequency. Statistical significance  
222 was assessed following Bonferroni correction for the number of methylation sites tested  
223 ( $\alpha = 0.05/411,169 = 1.2 \times 10^{-7}$ ). A previous power analysis for DNA methylation studies  
224 in discordant monozygotic twins indicated that with 50 discordant pairs, there's 80% power to  
225 detect methylation differences of 15% (at epigenome-wide significance; i.e. following multiple  
226 testing correction)[21]. Power quickly drops for smaller effect sizes; e.g. with 50 discordant  
227 pairs, the power to detect a 10% methylation difference is 10% and the power to detect a  
228 methylation difference of 5% approaches alpha[21].

229

### 230 ***Dose-response relationships***

231 For significant CpGs from the EWAS of discordant monozygotic twin pairs, we examined  
232 dose-response relationships in smoking concordant pairs (both twins were current smokers)  
233 by correlating within-pair differences in DNA methylation with within-pair differences in  
234 smoking packyears and cigarettes per day. Secondly, in twin pairs discordant for former  
235 smoking (one twin never smoked and the other one is a former smoker), we correlated and  
236 plotted within-pair differences in DNA methylation with the time since quitting smoking to

237 assess the relationship between time since quitting smoking and reversal of methylation  
238 differences within monozygotic twin pairs.

239

#### 240 ***Enrichment analyses***

241 We used the EWAS Toolkit from the EWAS atlas[22] to perform enrichment analyses of  
242 Gene Ontology Terms, Kegg Pathways, and previously associated traits among top-sites  
243 from the EWAS in discordant monozygotic twin pairs (current versus never). With the trait  
244 enrichment tool of the EWAS analysis, we tested for enrichment of all traits (680) that were  
245 present in the atlas on April 26, 2022. Because the software requires a minimum of 20 input  
246 CpGs, we selected the top 20 CpGs from the EWAS in discordant monozygotic pairs for the  
247 enrichment analyses using the EWAS toolkit.

248 To study overlap of EWAS signal with genetic findings for smoking, we considered the  
249 largest GWAS meta-analysis of smoking phenotypes, which is the meta-analysis of smoking  
250 initiation by the GWAS and Sequencing Consortium of Alcohol and Nicotine use  
251 (GSCAN)[10]. We obtained leave-one out meta-analysis results with NTR excluded. From  
252 the GWAS, we selected all SNPs with a p-value  $<5.0 \times 10^{-8}$  and determined the distance of  
253 each Illumina 450k methylation site to each SNP. We then tested whether methylation sites  
254 within 1 Mb of genome-wide significant SNPs from the GWAS showed a stronger signal in  
255 the within-pair EWAS of smoking discordant monozygotic pairs compared to other genome-  
256 wide methylation sites, by regressing the EWAS test statistics on a variable (“GWAS locus”)  
257 indicating if the CpG is located within a 1 Mb window from SNPs associated with smoking  
258 initiation (1 = yes, 0 = no):

$$|t| = \text{Intercept} + \beta_{\text{GWAS locus}} * \text{GWAS locus}$$

259 Where  $|t|$  represents the absolute t-statistic from the paired t-test comparing within-pair  
260 methylation differences in smoking discordant pairs and  $\beta_{\text{GWAS locus}}$  represents the estimate  
261 for  $\text{GWAS}_{\text{locus}}$ , i.e. the change in the t-test statistic associated with a one-unit change in the

262 variable GWAS locus (e.g. being within 1 Mb of SNPs associated with smoking initiation). For  
263 each enrichment test, bootstrap standard errors were computed with 2000 bootstraps with the  
264 R-package 'simpleboot'.

265

## 266 **Gene Expression**

267 For significant CpGs from the EWAS of discordant monozygotic twin pairs (current versus  
268 never), we examined whether the DNA methylation was associated with gene expression  
269 levels in *cis*. To this end, we used an independent whole blood RNA-sequencing dataset  
270 from the Biobank-based Integrative Omics Study (BIOS) consortium that did not include  
271 NTR, and tested associations between genome-wide CpGs and transcripts in *cis* (<250 kb),  
272 as described in detail previously[23]. In short, methylation and expression levels in whole-  
273 blood samples (n=2,101) were quantified with Illumina Infinium HumanMethylation450  
274 BeadChip arrays and with RNA-seq (2x50bp paired-end, Hiseq2000, >15M read pairs per  
275 sample). For each target CpG (epigenome-wide significant DMPs), we identified transcripts  
276 in *cis* (<250 kb), for which methylation levels were significantly associated with gene  
277 expression levels at the experiment-wide threshold applied by this study (FDR<5.0%), after  
278 regressing out mQTL and eQTL effects. We also examined whether significant CpGs from  
279 the EWAS of discordant monozygotic twin pairs mapped to genes that were previously  
280 reported to be differentially expressed in monozygotic pairs of which one twin never smoked,  
281 and the other was a current smoker at the time of blood sampling (based on Affymetrix U219  
282 array data; n=56 pairs; note: the 53 discordant pairs included in the current study of DNA  
283 methylation are a sub-set of the 56 discordant pairs included in the study of gene  
284 expression)[5].

285

## 286 **Results**

287 Descriptives of the smoking discordant and concordant monozygotic twin pairs are given in  
288 **table 1**. In twin pairs discordant for current smoking status (N=53 pairs, mean age=33

289 years), the smoking twin on average smoked 8.9 cigarettes per day at the time of blood  
290 sampling, and had an average smoking history equivalent to 6.8 pack years. The  
291 epigenome-wide association study (EWAS) analysis in pairs discordant for current smoking  
292 status identified 13 epigenome-wide significant ( $P < 1.20 \times 10^{-7}$ ) differentially methylated  
293 positions (DMPs; **Fig. 2a**). Genome-wide test statistics were not inflated (**Additional file 1**).  
294 Absolute differences in methylation ranged from 2.5-13% (0.025-0.13 on the methylation  $\beta$ -  
295 value scale), with a mean of 5.4% (**Table 2**). Eight of the 13 CpGs (61.5%) showed lower  
296 methylation in the current smoking twins compared to their non-smoking twins.

297 In twin pairs discordant for former smoking (N=72 pairs, mean age=41 years), the twins, who  
298 used to smoke, had quit smoking on average 14 years ago, while the other twins had never  
299 initiated regular smoking. In this group, no epigenome-wide significant DMPs were identified,  
300 and within-pair differences at the 13 significant DMPs identified in the previous analysis were  
301 diminished (average reduction: 81%, range=61-96%; **Fig. 2b, Table 2**). By contrast, in twin  
302 pairs of which one twin was a current smoker at blood draw and the co-twin had quit smoking  
303 (on average 9 years, ago, N=66 pairs), the reduction of within-pair differences at the 13 top  
304 CpGs was much smaller (on average, 31%, range 15-52%; **Fig. 2b, Additional file 2**), and 5  
305 of the 13 DMPs identified by comparing current and never smoking twins were also  
306 epigenome-wide significant in this group. Furthermore, 5 additional epigenome-wide CpGs  
307 were identified in current/former smoking discordant pairs (**Additional file 3**). **Fig. 2b**  
308 illustrates the pattern of within-pair differences at the 13 top DMPs identified in current/never  
309 discordant monozygotic pairs: largest differences in current/never smoking discordant pairs,  
310 smaller differences in former/never discordant pair, and current/former discordant pairs are  
311 intermediate. Differences are smallest within smoking concordant pairs. This pattern is in line  
312 with smoking-associated methylation patterns in blood cells being to a large extent reversible  
313 upon quitting smoking.

314 Distributions of within-pair differences in smoking-discordant and concordant pairs for the top  
315 1000 CpGs of the EWAS in discordant pairs are shown in **Fig. 3a**. The distributions illustrate

316 that differences are largest, as expected, within monozygotic twin pairs discordant for current  
317 smoking (current/never smoking pairs), followed by discordant current/former smoking  
318 discordant pairs, followed by former/never smoking discordant monozygotic twin pairs.  
319 Monozygotic pairs concordant for current smoking also show notable within-pair differences  
320 at these CpGs that are substantially larger compared to monozygotic pairs concordant for  
321 never smoking (**Fig. 3a**). This could be explained by within-pair differences in the number of  
322 cigarettes smoked by monozygotic twins who were concordant for current smoking. The twin  
323 correlations in current smoking monozygotic twin pairs were  $r=0.50$ ,  $p=2.2 \times 10^{-6}$  for cigarettes  
324 per day (**Fig. 3b**) and  $r=0.43$ ,  $p=3.2 \times 10^{-4}$  for packyears, respectively. Within-pair differences  
325 in DNA methylation at the 13 top-CpGs correlated with within-pair differences in the number  
326 of cigarettes smoked per day (mean absolute  $r=0.38$ , range (for different CpGs): -0.56-0.41;  
327 **Table 3, Fig. 3c**) and with within-pair differences in packyears (mean absolute  $r=0.46$ ;  
328 range: -0.65-0.42; **Table 3**). In twin pairs discordant for former smoking, within-pair  
329 differences in DNA methylation at the 13 top-CpGs were weakly correlated with time since  
330 quitting smoking (mean  $r=-0.11$ , range=-0.28-0.05, **Additional file 4**). Based on scatterplots  
331 of the within-pair methylation differences against time since quitting smoking (**Fig. 3d**), we  
332 hypothesized that the lack of a strong correlation with time since quitting smoking might be  
333 explained by most of the reversal taking place within the first years after quitting smoking.  
334 We therefore repeated the analysis restricting to those pairs of which the smoking twin had  
335 quit smoking less than 5 years ago (N=15 pairs). In this group, within-pair differences in DNA  
336 methylation at the 13 top-CpGs were on average more strongly correlated with time since  
337 quitting smoking (mean  $r=-0.16$ , range=-0.48-0.23) but the sample size was greatly reduced  
338 and correlations were non-significant.

339 All 13 differentially methylated CpGs identified in current smoking-discordant pairs have been  
340 previously associated with smoking. To the study the overlap of methylation differences  
341 between smoking discordant twins with loci that have a causal effect on smoking, we  
342 considered the largest GWAS meta-analysis of smoking phenotypes, the meta-analysis of

343 smoking initiation by the GWAS and Sequencing Consortium of Alcohol and Nicotine use  
344 (GSCAN)[10]. Three of the 13 epigenome-wide significant DMPs detected in smoking-  
345 discordant monozygotic pairs (cg13411554, cg00336149, and cg21188533 in *CACNA1D*)  
346 are located within 1Mb of a GWAS locus associated with smoking initiation. The methylation  
347 sites within 1 Mb of genome-wide significant SNPs from the GWAS overall did not show a  
348 stronger signal in the within-pair EWAS of smoking discordant monozygotic pairs compared  
349 to other genome-wide methylation sites (beta=-0.002, se=0.004, p=0.056, **Fig. 2c**).

350 We tested for enrichment of methylation sites previously associated with 680 traits reported  
351 in the EWAS atlas[22], among the top differentially methylated loci in smoking discordant  
352 pairs, which showed strong enrichment of smoking-related traits (**Additional file 5**).

353 Enrichment analysis based on Kegg Pathways showed one significantly enriched pathway;  
354 Dopaminergic Synapse (hsa04728; **Additional file 6**), with 3 of the top differentially  
355 methylated loci in smoking discordant monozygotic pairs mapping to this pathway;  
356 *CACNA1D*, *GNG12*, and *ARRB1*. No significant enrichment was seen in GO pathways after  
357 multiple testing correction (**Additional file 7**).

358 To examine potential functional consequences of top DMPs, we used previously published  
359 data on whole-blood DNA methylation and RNA sequencing (n = 2,101 samples). At four of  
360 the 13 CpGs, DNA methylation level in blood was associated with the expression level of  
361 nearby genes (**Table 4**). At three CpGs, a higher methylation level correlated with lower  
362 expression level. None of the 13 CpGs overlapped with six genes that were differentially  
363 expressed in monozygotic pairs discordant for current smoking[5].

## 364 **Discussion**

365 Previous epigenome-wide association studies (EWAS) have identified robust differences in  
366 DNA methylation between smokers and non-smokers at a number of loci. These differences  
367 may reflect true smoking-reactive DNA methylation patterns, but can also be driven by  
368 (genetic) confounding or reverse causation. We exploited a strong within-family design, i.e.,  
369 the discordant monozygotic twin design[24], to identify smoking-reactive loci. By analysing

370 whole blood genome-wide DNA methylation patterns in 53 monozygotic pairs discordant for  
371 current smoking, we found 13 CpGs with a difference in methylation level between the  
372 current smoking twin and the twin who never smoked. All 13 CpGs have been previously  
373 associated with smoking in unrelated individuals and in line with previous studies that  
374 compared unrelated smokers and controls[2], our data from monozygotic pairs discordant for  
375 former smoking also indicate that methylation patterns are to a large extent reversible upon  
376 smoking cessation. We further showed that differences in smoking level exposure for  
377 monozygotic twins who are both current smokers but differ in the number of cigarettes they  
378 smoke are reflected in their DNA methylation profiles.

379 The strongest smoking-associated loci typically detected in human blood EWAS are genes  
380 involved in detoxification pathways of aromatic hydrocarbons, such as *AHRR* and  
381 *CYP1A1*[1], of which *AHRR* was also present among the top differentially methylated loci in  
382 our analysis of discordant twins. Mainstream tobacco smoke is a mixture of thousands of  
383 chemicals[25]. Although the effects of many of the compounds present in cigarette smoke  
384 are unknown, several mechanisms have been described through which cigarette smoking  
385 may affect global or gene-specific DNA methylation levels. These include DNA damage  
386 induced by certain compounds such as arsenic, chromium, formaldehyde, polycyclic  
387 aromatic hydrocarbons, and nitrosamines that all cause double-stranded breaks[26] (which  
388 causes increased methylation near repaired DNA) [27],[28], hypoxia induced by carbon  
389 monoxide[29] (causing global CpG island demethylation by disrupting methyl donor  
390 availability), and modulation of the expression level or activity of DNA-binding proteins, such  
391 as transcription factors[30]. Nicotine, presumed to be the major addictive compound in  
392 cigarette smoke (although other putative addictive compounds have also been  
393 described[31]), has gene regulatory effects. Binding of nicotine to nicotinic acetylcholine  
394 receptors causes downstream activation of cAMP response element binding protein, which is  
395 a key transcription factor for many genes[32]. In mouse brain, nicotine downregulates the  
396 DNA methyl transferase gene *Dnmt*[33].

397 Importantly, effects of smoking on DNA methylation in brain cells have been hypothesized to  
398 contribute to addiction[3], but it is largely unknown to what extent addiction-related DNA  
399 methylation dynamics are captured in other tissues such as blood. Nicotinic receptors are  
400 especially abundant in the central and peripheral nervous system, but are also present in  
401 other tissues. In peripheral blood, nicotinic receptors are present on lymphocytes and  
402 polymorphonuclear cells[34], suggesting that EWA studies performed on blood cells might  
403 capture nicotine-reactive methylation patterns. Interesting in this regard is our finding that  
404 among the top differentially methylated CpGs in smoking discordant pairs are multiple CpGs  
405 in *CACNA1D* and *GNG12*, which encode subunits of a calcium voltage-gated channel and G  
406 protein, respectively; proteins that interact with the nicotinic acetylcholine receptor, and the  
407 related enrichment of Kegg Pathway dopaminergic neuron. Methylation levels at these CpGs  
408 might be reactive to nicotine exposure. Furthermore, the CpGs in *CACNA1D* are in proximity  
409 of a GWAS locus for smoking initiation, suggesting that this might be a locus that is not only  
410 reactive to smoking exposure, but may also contribute to smoking behaviour. Although it  
411 remains to be established if the epigenetic and genetic variation at this locus are functionally  
412 connected (i.e. have the same downstream consequences on gene expression), these  
413 results suggest that these CpGs can be interesting candidates for further studies into  
414 peripheral biomarkers of smoking addiction. Since we applied a discordant monozygotic twin  
415 design, the methylation differences identified at this locus in our study cannot be driven by  
416 mQTL effects of the SNPs associated with smoking.

417 The main strength of our study is the use of the discordant monozygotic twin design to  
418 examine the effects of smoking, because it rules out genetic confounding, as well as many  
419 other confounding factors. The value of studying smoking effects against an identical genetic  
420 background is clear if one considers that one of the most strongly associated genetic variants  
421 for nicotine dependence is located in the DNA methyltransferase gene *DNMT3B*[35]. This  
422 strongly implies a role for DNA methylation in nicotine addiction, but it also suggests that  
423 horizontal genetic pleiotropy might contribute to associations between DNA methylation and



424 smoking in ordinary case-control EWASs, where differences in DNA methylation between  
425 unrelated smokers and non-smokers may reflect differences in genotype. Our analysis had  
426 adequate power to detect large effects (i.e., the top hits identified in typical smoking  
427 EWAS)[21]. Larger sample sizes are required to achieve adequate power to detect smaller  
428 effects. While the pattern of within-pair differences in current/never, current/former and  
429 former/never discordant monozygotic twin pairs was clearly in line with reversal of  
430 methylation patterns following smoking cessation, we did not find a strong correlation  
431 between within-pair differences in DNA methylation and time since quitting smoking in former  
432 smoking discordant pairs. If most reversal takes place gradually in the first few years after  
433 smoking cessation, it might require larger sample sizes of twin pairs discordant for recently  
434 quitting smoking to detect such a correlation. Larger sample sizes may be achieved by  
435 combining data from multiple twin cohorts in a meta-analysis. Common limitations that apply  
436 to many EWA studies including ours are that we only analysed DNA methylation data from  
437 blood and that the technique used to measure DNA methylation only covers a small sub-set  
438 of all CpG sites in the genome.

439

#### 440 **Conclusion**

441 In conclusion, we studied reactivity of DNA methylation in blood cells to smoking and  
442 reversibility of methylation patterns upon quitting smoking in monozygotic twins. Analyses in  
443 special groups such as monozygotic twins are valuable to validate results from large  
444 population-based EWAS meta-analyses, or to train more accurate methylation scores for  
445 environmental exposures that are not confounded by genetic effects. Our results illustrate the  
446 potential to utilize DNA methylation profiles of monozygotic twins as a read out of discordant  
447 exposures at present and in the past.

#### 448 **Availability of data and materials**

449 The HumanMethylation450 BeadChip data from the NTR are available as part of the  
450 Biobank-based Integrative Omics Studies (BIOS) Consortium in the European Genome-

451 phenome Archive (EGA), under the accession code EGAD00010000887. The pipeline for  
452 DNA methylation-array analysis developed by the Biobank-based Integrative Omics Study  
453 (BIOS) consortium is available  
454 here: [https://molepi.github.io/DNAArray\\_workflow/](https://molepi.github.io/DNAArray_workflow/) (<https://doi.org/10.5281/zenodo.3355292>  
455 ). All other analysis code is available upon request from the corresponding author.

## 456 **Acknowledgments**

457 NTR warmly thanks all participants. We thank Conor Dolan for providing feedback on the  
458 manuscript. We acknowledge the contributions of the investigators of the BIOS consortium  
459 (Additional file 8): Bastiaan T. Heijmans, Peter A.C. 't Hoen, Joyce van Meurs, Aaron Isaacs,  
460 Rick Jansen, Lude Franke, René Pool, Jouke J. Hottenga, Marleen MJ van Greevenbroek,  
461 Coen D.A. Stehouwer, Carla J.H. van der Kallen, Casper G. Schalkwijk, Cisca Wijmenga,  
462 Sasha Zhernakova, Ettje F. Tigchelaar, P. Eline Slagboom, Marian Beekman, Joris Deelen,  
463 Diana van Heemst, Jan H. Veldink, Leonard H. van den Berg, Cornelia M. van Duijn<sup>4</sup>, Bert A.  
464 Hofman<sup>11</sup>, Aaron Isaacs, André G. Uitterlinden, P. Mila Jhamai, Michael Verbiest, H. Eka D.  
465 Suchiman, Marijn Verkerk, Ruud van der Breggen, Jeroen van Rooij, Nico Lakenberg,  
466 Hailiang Mei, Maarten van Iterson, Michiel van Galen, Jan Bot, Dasha V. Zhernakova, Rick  
467 Jansen, Peter van 't Hof, Patrick Deelen, Irene Nooren, Matthijs Moed, Martijn Vermaat,  
468 René Luijk, Marc Jan Bonder, Freerk van Dijk, Michiel van Galen, Wibowo Arindrarto,  
469 Szymon M. Kielbasa, Morris A. Swertz, Erik. W van Zwet.

## 470 **Funding**

471 We acknowledge funding from the National Institute on Drug Abuse grant DA049867, the  
472 Netherlands Organization for Scientific Research (NWO): Biobanking and Biomolecular  
473 Research Infrastructure (BBMRI–NL, NWO 184.033.111) and the BBRMI-NL-financed BIOS  
474 Consortium (NWO 184.021.007), NWO Large Scale infrastructures X-Omics (184.034.019),  
475 Genotype/phenotype database for behavior genetic and genetic epidemiological studies  
476 (ZonMw Middelgroot 911-09-032); Netherlands Twin Registry Repository: researching the

477 interplay between genome and environment (NWO-Groot 480-15-001/674); the Avera  
478 Institute, Sioux Falls (USA) and the National Institutes of Health (NIH R01 HD042157-01A1,  
479 MH081802, Grand Opportunity grants 1RC2 MH089951 and 1RC2 MH089995); epigenetic  
480 data were generated at the Human Genomics Facility (HuGe-F) at ErasmusMC Rotterdam.  
481 DIB acknowledges the Royal Netherlands Academy of Science Professor Award  
482 (PAH/6635).

#### 483 **Competing financial interests**

484 None.

#### 485 **Author contributions**

486 Phenotype acquisition or harmonization (including design/funding of contributing studies):  
487 GW, ECDG, DIB, MCN. Methylation data acquisition and/or QC: JVD, GW, DIB. Statistical  
488 Analysis: JVD. Interpretation of results: JVD, MCN, Draft manuscript preparation: JVD. All  
489 authors critically read and approved the final version of the manuscript.

490

491

492

493

494

495

496

497

498

499

500

501

502

503 **References**

- 504 1. Gao X, Jia M, Zhang Y, Breitling LP, Brenner H. DNA methylation changes of whole blood  
505 cells in response to active smoking exposure in adults: a systematic review of DNA  
506 methylation studies. *Clin Epigenetics* [Internet]. *Clinical Epigenetics*; 2015;7:113. Available  
507 from:  
508 [http://www.pubmedcentral.nih.gov/articlerender.fcgi?artid=4609112&tool=pmcentrez&rendert](http://www.pubmedcentral.nih.gov/articlerender.fcgi?artid=4609112&tool=pmcentrez&rendertype=abstract)  
509 [ype=abstract](http://www.pubmedcentral.nih.gov/articlerender.fcgi?artid=4609112&tool=pmcentrez&rendertype=abstract)
- 510 2. Joehanes R, Just AC, Marioni RE, Pilling LC, Reynolds LM, Mandaviya PR, et al.  
511 Epigenetic Signatures of Cigarette Smoking. *Circ Cardiovasc Genet*. 2016;9:436–47.
- 512 3. Zillich L, Poisel E, Streit F, Frank J, Fries GR, Foo JC, et al. Epigenetic Signatures of  
513 Smoking in Five Brain Regions. *J. Pers. Med.* . 2022.
- 514 4. Liu C, Marioni RE, Hedman KK, Pfeiffer L, Tsai PC, Reynolds LM, et al. A DNA  
515 methylation biomarker of alcohol consumption. *Mol Psychiatry*. 2016;
- 516 5. Vink JM, Jansen R, Brooks A, Willemsen G, van Grootheest G, de Geus E, et al.  
517 Differential gene expression patterns between smokers and non-smokers: cause or  
518 consequence? *Addict Biol*. 2017;22:550–60.
- 519 6. Ouwens KG, Jansen R, Tolhuis B, Slagboom PE, Penninx BWJH, Boomsma DI. A  
520 characterization of postzygotic mutations identified in monozygotic twins. *Hum Mutat*. 2018;
- 521 7. Jonsson H, Magnusdottir E, Eggertsson HP, Stefansson OA, Arnadottir GA, Eiriksson O,  
522 et al. Differences between germline genomes of monozygotic twins. *Nat Genet*. 2021;53:27–  
523 34.
- 524 8. Leeuwen DM va., Agen E van, Gottschalk RWH, Vlietinck R, Gielen M, Herwijnen MHM  
525 va., et al. Cigarette smoke-induced differential gene expression in blood cells from  
526 monozygotic twin pairs. *Carcinogenesis* [Internet]. 2007;28:691–7. Available from:  
527 <https://doi.org/10.1093/carcin/bgl199>

- 528 9. Allione A, Marcon F, Fiorito G, Guarrera S, Siniscalchi E, Zijno A, et al. Novel epigenetic  
529 changes unveiled by monozygotic twins discordant for smoking habits. PLoS One [Internet].  
530 2015;10:e0128265. Available from:  
531 <http://www.pubmedcentral.nih.gov/articlerender.fcgi?artid=4456379&tool=pmcentrez&render>  
532 [type=abstract](http://www.pubmedcentral.nih.gov/articlerender.fcgi?artid=4456379&tool=pmcentrez&render)
- 533 10. Liu M, Jiang Y, Wedow R, Li Y, Brazel DM, Chen F, et al. Association studies of up to 1.2  
534 million individuals yield new insights into the genetic etiology of tobacco and alcohol use. Nat  
535 Genet. 2019;1.
- 536 11. van Dongen J, Nivard MG, Willemsen G, Hottenga J-J, Helmer Q, Dolan C V, et al.  
537 Genetic and environmental influences interact with age and sex in shaping the human  
538 methylome. Nat Commun [Internet]. 2016;7:11115. Available from:  
539 <http://www.pubmedcentral.nih.gov/articlerender.fcgi?artid=4820961&tool=pmcentrez&render>  
540 [type=abstract](http://www.pubmedcentral.nih.gov/articlerender.fcgi?artid=4820961&tool=pmcentrez&render)
- 541 12. Ligthart L, van Beijsterveldt CEM, Kevenaar ST, de Zeeuw E, van Bergen E, Bruins S, et  
542 al. The Netherlands Twin Register: Longitudinal Research Based on Twin and Twin-Family  
543 Designs. Twin Res Hum Genet. 2019;
- 544 13. Willemsen G, de Geus EJ, Bartels M, van Beijsterveldt CE, Brooks a I, Estourgie-van  
545 Burk GF, et al. The Netherlands Twin Register biobank: a resource for genetic  
546 epidemiological studies. Twin Res Hum Genet [Internet]. 2010;13:231–45. Available from:  
547 <http://www.ncbi.nlm.nih.gov/pubmed/20477721>
- 548 14. Bibikova M, Barnes B, Tsan C, Ho V, Klotzle B, Le JM, et al. High density DNA  
549 methylation array with single CpG site resolution. Genomics. 2011;98:288–95.
- 550 15. Iterson M Van, Tobi EW, Slieker RC, Hollander W Den, Slagboom PE, Heijmans BT.  
551 MethylAid: visual and interactive quality control of large Illumina 450k datasets.  
552 Bioinformatics. 2014;30:3435–7.

- 553 16. Maarten van Iterson, Elmar Tobi, Roderick Sliker, Wouter den Hollander, Koen Dekkers,  
554 Rene Luijk ES, Heijmans and B. Streamlined workflow for the quality control, normalization  
555 and bias-free analysis of Illumina methylation array data - The Leiden approach [Internet].  
556 [cited 2018 Jun 22]. Available from: [https://molepi.github.io/DNAArray\\_workflow/](https://molepi.github.io/DNAArray_workflow/)
- 557 17. Chen Y, Lemire M, Choufani S, Butcher DT, Zanke BW, Gallinger S, et al. Discovery of  
558 cross-reactive probes and polymorphic CpGs in the Illumina Infinium HumanMethylation450  
559 microarray. *Epigenetics*. 2013;2294.
- 560 18. Fortin J, Labbe A, Lemire M, Zanke BW, Hudson TJ, Fertig EJ, et al. Functional  
561 normalization of 450k methylation array data improves replication in large cancer studies.  
562 *Genome Biol*. 2014;1–17.
- 563 19. Francioli LC, Menelaou A, Pulit SL, Van Dijk F, Palamara PF, Elbers CC, et al. Whole-  
564 genome sequence variation, population structure and demographic history of the Dutch  
565 population. *Nat Genet*. 2014;
- 566 20. Team RC. R: A language and environment for statistical computing. 2013;
- 567 21. Tsai PC, Bell JT. Power and sample size estimation for epigenome-wide association  
568 scans to detect differential DNA methylation. *Int J Epidemiol*. 2015;44:1429–41.
- 569 22. Li M, Zou D, Li Z, Gao R, Sang J, Zhang Y, et al. EWAS Atlas: A curated knowledgebase  
570 of epigenome-wide association studies. *Nucleic Acids Res*. 2019;
- 571 23. Bonder MJ, Luijk R, Zhernakova D V, Moed M, Deelen P, Vermaat M, et al. Disease  
572 variants alter transcription factor levels and methylation of their binding sites. *Nat Genet*.  
573 United States; 2017;49:131–8.
- 574 24. Bell JT, Spector TD. DNA methylation studies using twins: what are they telling us?  
575 *Genome Biol* [Internet]. 2012;13:172. Available from:  
576 <http://www.ncbi.nlm.nih.gov/pubmed/23078798>  
577 <http://www.pubmedcentral.nih.gov/articlerender.fcgi?artid=PMC3491399>

- 578 25. Rodgman A, Perfetti TA. The Chemical Components of Tobacco and Tobacco Smoke.  
579 Chem. Components Tob. Tob. Smoke. 2008.
- 580 26. Smith CJ, Hansch C. The relative toxicity of compounds in mainstream cigarette smoke  
581 condensate. Food Chem Toxicol. 2000;38:637–46.
- 582 27. Mortusewicz O, Schermelleh L, Walter J, Cardoso MC, Leonhardt H. Recruitment of DNA  
583 methyltransferase I to DNA repair sites. Proc Natl Acad Sci U S A. 2005;102:8905–9.
- 584 28. Cuzzo C, Porcellini A, Angrisano T, Morano A, Lee B, Di Pardo A, et al. DNA damage,  
585 homology-directed repair, and DNA methylation. PLoS Genet. 2007;3:1144–62.
- 586 29. Olson KR. Carbon monoxide poisoning: Mechanisms, presentation, and controversies in  
587 management. J Emerg Med. 1984;1:233–43.
- 588 30. Lee KWK, Pausova Z. Cigarette smoking and DNA methylation. Front. Genet. 2013.
- 589 31. Talhout R, Schulz T, Florek E, Van Benthem J, Wester P, Opperhuizen A. Hazardous  
590 Compounds in Tobacco Smoke. Int. J. Environ. Res. Public Heal. . 2011.
- 591 32. Shen JX, Yakel JL. Nicotinic acetylcholine receptor-mediated calcium signaling in the  
592 nervous system. Acta Pharmacol. Sin. 2009. p. 673–80.
- 593 33. R. S, E. M, A. Z, F. P, M. H, E. C, et al. Nicotine decreases DNA methyltransferase 1  
594 expression and glutamic acid decarboxylase 67 promoter methylation in GABAergic  
595 interneurons. Proc Natl Acad Sci [Internet]. Proceedings of the National Academy of  
596 Sciences; 2008;105:16356–61. Available from: <https://doi.org/10.1073/pnas.0808699105>
- 597 34. Benhammou K, Lee M, Strook MA, Sullivan B, Logel J, Raschen K, et al. [3H]Nicotine  
598 binding in peripheral blood cells of smokers is correlated with the number of cigarettes  
599 smoked per day. Neuropharmacology. 2000;39:2818–29.
- 600 35. Hancock DB, Guo Y, Reginsson GW, Gaddis NC, Lutz SM, Sherva R, et al. Genome-  
601 wide association study across European and African American ancestries identifies a SNP in  
602 DNMT3B contributing to nicotine dependence. Mol Psychiatry. 2017;

603 **Figure Legends**

604

605 **Figure 1. DNA methylation analysis in smoking discordant and smoking concordant**

606 **monozygotic twin pairs.** Blood DNA methylation profiles (Illumina 450k array) from six  
607 groups of monozygotic twin pairs were analysed.

608

609 **Figure 2. Top differentially methylated loci identified in monozygotic twin pairs**

610 **discordant for current smoking** a) Manhattan plot of the EWAS in 53 smoking discordant  
611 monozygotic twin pairs (current versus never). The red horizontal line denotes the  
612 epigenome-wide significance threshold (Bonferroni correction) and 13 CpGs with significant  
613 differences are highlighted. b) Mean within-pair differences in monozygotic twin pairs at the  
614 13 CpGs that were epigenome-wide significant in smoking discordant monozygotic pairs.

615 Mean within-pair differences of the residuals obtained after correction of methylation beta-  
616 values for covariates are shown for 53 monozygotic pairs discordant for current/never  
617 smoking, 66 monozygotic pairs discordant for current/former smoking, 72 monozygotic pairs  
618 discordant for former/never smoking, 83 concordant current smoking monozygotic pairs, 88  
619 concordant former smoking monozygotic pairs, and 406 concordant never smoking  
620 monozygotic pairs. c) QQ-plot showing p-values from the EWAS in 53 smoking discordant  
621 monozygotic twin pairs (current versus never). P-values for CpGs located nearby significant  
622 SNPs from the GWAS of smoking initiation are plotted in blue and all other genome-wide  
623 CpGs are plotted in orange.

624

625 **Figure 3. DNA methylation differences in smoking discordant and smoking**

626 **concordant pairs.** a) Distributions of the mean absolute within-pair differences in discordant  
627 and concordant pairs at the top 1000 CpGs with the lowest p-value from the EWAS in  
628 discordant monozygotic pairs (current versus never smokers). b) Scatterplot of cigarettes  
629 smoked per day in 80 concordant current smoking monozygotic pairs with complete data c)  
630 Scatterplot of within-pair differences in cigarettes smoked per day versus DNA methylation



631 at cg05575921 (*AHRR*) in 80 concordant current smoking monozygotic pairs with complete  
632 data. d) Scatterplot of within-pair differences in DNA methylation at cg05575921 (*AHRR*)  
633 versus time since quitting smoking (years) in 63 pairs discordant for former smoking.

634

635

636

637

638

639

640

641

642

643

644

645

646

647

648

649

650

651

652 **Table 1** Descriptive statistics for smoking discordant and concordant monozygotic twin pairs

|                                                             | Discordant Current/never<br>(53 pairs) |               |           |         | Discordant Former/never<br>(72 pairs) |               |           |         | Discordant Current/former<br>(66 pairs) |               |           |         | Concordant Current<br>(83 pairs) |               |           |         | Concordant never<br>(406 pairs) |               |           |         | Concordant former<br>(88 pairs) |                |           |         |
|-------------------------------------------------------------|----------------------------------------|---------------|-----------|---------|---------------------------------------|---------------|-----------|---------|-----------------------------------------|---------------|-----------|---------|----------------------------------|---------------|-----------|---------|---------------------------------|---------------|-----------|---------|---------------------------------|----------------|-----------|---------|
|                                                             | Current smoker                         | Never-smoker  | Mean diff | P-value | Former smoker                         | Never-smoker  | Mean diff | P-value | Current smoker                          | Former smoker | Mean diff | P-value | Twin 1                           | Twin 2        | Mean diff | P-value | Twin 1                          | Twin 2        | Mean diff | P-value | Twin 1                          | Twin 2         | Mean diff | P-value |
| % Female pairs                                              | 60.4%                                  | 60.4%         | n.a.      | n.a.    | 77.80%                                | 77.80%        | n.a.      | n.a.    | 69.7%                                   | 69.7%         | n.a.      | n.a.    | 61.4%                            | 61.4%         | n.a.      | n.a.    | 73.6%                           | 73.6%         | n.a.      | n.a.    | 64.8%                           | 64.8%          | n.a.      | n.a.    |
| age at blood sampling, mean (SD)                            | 33.1 (8.0)                             | 33.0 (7.9)    | 0.10      | 0.34    | 41.4 (13.2)                           | 41.4 (13.1)   | 0.02      | 0.83    | 42.2 (12.6)                             | 42.2 (12.5)   | -0.06     | 0.45    | 33.8 (10.3)                      | 33.9 (10.5)   | -0.12     | 0.10    | 33.1 (11.3)                     | 33.0 (11.2)   | 0.06      | 0.08    | 45.2 (13.4)                     | 45.2 (13.4)    | 0.09      | 0.29    |
| Cigarettes per day at blood sampling, mean (SD), N missings | 8.9 (6.4), 6                           | n.a.          | n.a.      | n.a.    | n.a.                                  | n.a.          | n.a.      | n.a.    | 11.9 (7.2), 9                           | n.a.          | n.a.      | n.a.    | 11.1 (7.0), 2                    | 10.9 (6.9), 1 | 0.00      | 1.00    | n.a.                            | n.a.          | n.a.      | n.a.    | n.a.                            | n.a.           | n.a.      | n.a.    |
| Packyears, mean (SD), N missings                            | 6.8 (7.0), 13                          | n.a.          | n.a.      | n.a.    | 5.9 (11.1), 15                        | n.a.          | n.a.      | n.a.    | 13.6 (13.2), 9                          | 9.3 (8.7), 10 | 4.2       | 0.02    | 9.7 (9.3), 10                    | 8.3 (7.6), 9  | 0.22      | 0.82    | n.a.                            | n.a.          | n.a.      | n.a.    | 10.6 (11.5), 7                  | 9.8 (10.4), 1  | 0.78      | 0.55    |
| Years since quitting smoking, mean (SD), N missings         | n.a.                                   | n.a.          | n.a.      | n.a.    | 13.5 (11.4), 9                        | n.a.          | n.a.      | n.a.    | n.a.                                    | 9.0 (10.2), 2 | n.a.      | n.a.    | n.a.                             | n.a.          | n.a.      | n.a.    | n.a.                            | n.a.          | n.a.      | n.a.    | 11.9 (9.1), 8                   | 13.6 (11.8), 7 | -1.62     | 0.20    |
| Percentage monocytes, mean (SD), N missings                 | 8.0 (2.3), 0                           | 8.5 (2.4), 0  | -0.44     | 0.19    | 8.6 (2.0), 0                          | 8.3 (1.8), 0  | 0.29      | 0.19    | 8.6 (1.9), 0                            | 9.2 (3.1), 0  | -0.57     | 0.14    | 8.3 (2.1), 0                     | 8.1 (1.9), 0  | 0.20      | 0.36    | 8.5 (2.0), 0                    | 8.5 (2.2), 0  | 0.03      | 0.75    | 8.4 (2.4), 0                    | 8.5 (2.4), 0   | -0.06     | 0.75    |
| Percentage lymphocytes, mean (SD), N missings               | 35.0 (8.9), 0                          | 35.9 (10.0)   | -0.94     | 0.50    | 33.6 (8.5), 0                         | 34.0 (8.7)    | -0.37     | 0.77    | 35.8 (8.2), 0                           | 35.6 (8.5), 0 | 0.25      | 0.84    | 33.7 (8.3), 0                    | 34.1 (8.3), 0 | -0.44     | 0.67    | 36.3 (8.4), 0                   | 36.2 (8.4), 0 | 0.04      | 0.92    | 35.0 (7.7), 0                   | 34.1 (8.4), 0  | 0.95      | 0.26    |
| Percentage neutrophils, mean (SD), N missings               | 53.4 (9.5), 0                          | 52.1 (9.8), 0 | 1.34      | 0.38    | 54.4 (9.1), 0                         | 54.5 (9.1), 0 | -0.08     | 0.95    | 51.6 (9.0), 0                           | 51.7 (8.9), 0 | 0-0.06    | 0.96    | 53.7 (8.9), 0                    | 53.7 (9.3), 0 | 0.03      | 0.98    | 51.8 (8.7), 0                   | 51.9 (9.3), 0 | -0.08     | 0.86    | 52.8 (8.2), 0                   | 53.7 (8.4), 0  | -0.84     | 0.35    |
| Percentage eosinophils, mean (SD), N missings               | 3.1 (2.5), 0                           | 3.1 (2.1), 0  | .05       | 0.91    | 3.1 (1.9), 0                          | 2.9 (2.0), 0  | 0.15      | 0.53    | 3.3 (1.9), 0                            | 3.1 (1.7), 0  | 0.21      | 0.33    | 3.4 (2.2), 0                     | 3.4 (1.8), 0  | -0.03     | 0.91    | 2.9 (1.8), 0                    | 2.9 (1.9), 0  | -0.04     | 0.66    | 3.1 (1.9), 0                    | 3.2 (2.4), 0   | -0.06     | 0.77    |
| Percentage basophils, mean (SD), N missings                 | 0.5 (0.7), 0                           | 0.5 (0.7), 0  | -0.01     | 0.96    | 0.3 (0.3), 0                          | 0.4 (0.5), 0  | -0.02     | 0.76    | 0.6 (0.9), 0                            | 0.4 (0.4), 0  | 0.18      | 0.12    | 0.9 (3.1), 0                     | 0.6 (1.1), 0  | 0.25      | 0.49    | 0.5 (0.7), 0                    | 0.4 (0.7), 0  | 0.06      | 0.21    | 0.6 (1.1), 0                    | 0.6 (0.9), 0   | -0.01     | 0.97    |

653

654

655

656

657

658 **Table 2** Epigenome-wide significant differentially methylated CpGs in monozygotic pairs discordant for current smoking status

| mnID       | CHR | MAPINFO   | Gene*   | Nearest gene | Current smoking discordant pairs |                       |          |          |             | Former smoking discordant pairs (former/never) |                      |          |          |             |
|------------|-----|-----------|---------|--------------|----------------------------------|-----------------------|----------|----------|-------------|------------------------------------------------|----------------------|----------|----------|-------------|
|            |     |           |         |              | Mean Diff                        | p-value               | 95conf_L | 95conf_H | T-statistic | Mean Diff                                      | P-value              | 95conf_L | 95conf_H | T-Statistic |
| cg05575921 | 5   | 373378    | AHRR    | AHRR         | 0.132                            | 4.9x10 <sup>-11</sup> | 0.100    | 0.165    | 8.265       | 0.027                                          | 3.3x10 <sup>-4</sup> | 0.013    | 0.041    | 3.778       |
| cg21566642 | 2   | 233284661 |         | ALPPL2       | 0.092                            | 1.5x10 <sup>-10</sup> | 0.069    | 0.115    | 7.960       | 0.033                                          | 3.2x10 <sup>-6</sup> | 0.020    | 0.046    | 5.067       |
| cg05951221 | 2   | 233284402 |         | ALPPL2       | 0.066                            | 1.8x10 <sup>-9</sup>  | 0.048    | 0.084    | 7.270       | 0.026                                          | 4.6x10 <sup>-6</sup> | 0.016    | 0.037    | 4.964       |
| cg01940273 | 2   | 233284934 |         | ALPPL2       | 0.060                            | 2.1x10 <sup>-9</sup>  | 0.044    | 0.077    | 7.240       | 0.018                                          | 1.3x10 <sup>-4</sup> | 0.009    | 0.027    | 4.052       |
| cg13411554 | 3   | 53700276  | CACNA1D | CACNA1D      | -0.038                           | 6.0x10 <sup>-9</sup>  | -0.049   | -0.027   | -6.947      | -0.007                                         | 0.10                 | -0.016   | 0.002    | -1.655      |
| cg01901332 | 11  | 75031054  | ARRB1   | ARRB1        | 0.025                            | 8.0x10 <sup>-9</sup>  | 0.018    | 0.033    | 6.868       | 0.006                                          | 0.16                 | -0.002   | 0.013    | 1.425       |
| cg21161138 | 5   | 399360    | AHRR    | AHRR         | 0.046                            | 1.9x10 <sup>-8</sup>  | 0.032    | 0.059    | 6.642       | 0.002                                          | 0.64                 | -0.006   | 0.009    | 0.466       |
| cg00336149 | 3   | 53700195  | CACNA1D | CACNA1D      | -0.027                           | 2.0x10 <sup>-8</sup>  | -0.035   | -0.019   | -6.615      | -0.002                                         | 0.60                 | -0.008   | 0.005    | -0.524      |
| cg22132788 | 7   | 45002486  | MYO1G   | MYO1G        | -0.056                           | 2.4x10 <sup>-8</sup>  | -0.073   | -0.039   | -6.596      | -0.011                                         | 4.5x10 <sup>-3</sup> | -0.019   | -0.004   | -2.930      |
| cg21188533 | 3   | 53700263  | CACNA1D | CACNA1D      | -0.036                           | 3.9x10 <sup>-8</sup>  | -0.047   | -0.025   | -6.437      | -0.006                                         | 0.24                 | -0.015   | 0.004    | -1.196      |
| cg09935388 | 1   | 92947588  | GFI1    | GFI1         | 0.052                            | 4.1x10 <sup>-8</sup>  | 0.035    | 0.068    | 6.423       | 0.002                                          | 0.61                 | -0.006   | 0.010    | 0.519       |
| cg25648203 | 5   | 395444    | AHRR    | AHRR         | 0.035                            | 5.3x10 <sup>-8</sup>  | 0.024    | 0.046    | 6.353       | 0.002                                          | 0.48                 | -0.004   | 0.008    | 0.710       |
| cg19089201 | 7   | 45002287  | MYO1G   | MYO1G        | -0.040                           | 7.5x10 <sup>-8</sup>  | -0.053   | -0.028   | -6.260      | -0.007                                         | 0.13                 | -0.017   | 0.002    | -1.529      |

659 Coordinates are given based on genome build 37. Mean differences represent non-smoking twin minus smoking-twin (hence positive values indicate a higher methylation level in non-smoking  
 660 twins). The table shows the 13 epigenome-wide significant CpGs from the within-pair EWAS in 53 discordant monozygotic twin pairs (current versus never smokers). Results from the  
 661 comparison within 72 monozygotic pairs discordant for former smoking are also shown. \* CpGs without a gene name are located in intergenic regions. 95conf\_L=95% confidence interval  
 662 lower bound, 95conf\_H=95% confidence interval upper bound.

663

664

665

666

667

668 **Table 3** Correlations of within-pair differences in DNA methylation with within-pair differences in cigarettes per day and packyears in 83 concordant current  
 669 smoking monozygotic pairs

| cgid       | CHR | Position  | Gene           | Nearest gene   | cigarettes per day |                      | Packyears |                      |
|------------|-----|-----------|----------------|----------------|--------------------|----------------------|-----------|----------------------|
|            |     |           |                |                | <i>r</i>           | p-value              | <i>r</i>  | p-value              |
| cg05575921 | 5   | 373378    | <i>AHRR</i>    | <i>AHRR</i>    | -0.52              | 5.9x10 <sup>-7</sup> | -0.55     | 1.2x10 <sup>-6</sup> |
| cg21566642 | 2   | 233284661 |                | <i>ALPPL2</i>  | -0.49              | 4.7x10 <sup>-6</sup> | -0.56     | 8.1x10 <sup>-7</sup> |
| cg05951221 | 2   | 233284402 |                | <i>ALPPL2</i>  | -0.44              | 4.7x10 <sup>-5</sup> | -0.56     | 9.0x10 <sup>-7</sup> |
| cg01940273 | 2   | 233284934 |                | <i>ALPPL2</i>  | -0.56              | 7.0x10 <sup>-8</sup> | -0.65     | 2.0x10 <sup>-9</sup> |
| cg13411554 | 3   | 53700276  | <i>CACNA1D</i> | <i>CACNA1D</i> | 0.27               | 1.4x10 <sup>-2</sup> | 0.32      | 7.4x10 <sup>-3</sup> |
| cg01901332 | 11  | 75031054  | <i>ARRB1</i>   | <i>ARRB1</i>   | -0.23              | 3.8x10 <sup>-2</sup> | -0.34     | 5.5x10 <sup>-3</sup> |
| cg21161138 | 5   | 399360    | <i>AHRR</i>    | <i>AHRR</i>    | -0.52              | 8.4x10 <sup>-7</sup> | -0.52     | 7.4x10 <sup>-6</sup> |
| cg00336149 | 3   | 53700195  | <i>CACNA1D</i> | <i>CACNA1D</i> | 0.36               | 1.0x10 <sup>-3</sup> | 0.42      | 3.5x10 <sup>-4</sup> |
| cg22132788 | 7   | 45002486  | <i>MYO1G</i>   | <i>MYO1G</i>   | 0.41               | 2.1x10 <sup>-4</sup> | 0.41      | 8.4x10 <sup>-4</sup> |
| cg21188533 | 3   | 53700263  | <i>CACNA1D</i> | <i>CACNA1D</i> | 0.32               | 4.1x10 <sup>-3</sup> | 0.38      | 1.4x10 <sup>-3</sup> |
| cg09935388 | 1   | 92947588  | <i>GFI1</i>    | <i>GFI1</i>    | -0.42              | 9.1x10 <sup>-5</sup> | -0.59     | 1.4x10 <sup>-7</sup> |
| cg25648203 | 5   | 395444    | <i>AHRR</i>    | <i>AHRR</i>    | -0.28              | 1.2x10 <sup>-2</sup> | -0.42     | 4.3x10 <sup>-4</sup> |
| cg19089201 | 7   | 45002287  | <i>MYO1G</i>   | <i>MYO1G</i>   | 0.15               | 1.8x10 <sup>-1</sup> | 0.27      | 2.6x10 <sup>-2</sup> |

670

671

672

673

674

675 **Table 4** Significantly associated transcripts in cis for CpGs that are differentially methylated in smoking discordant monozygotic twin pairs

| CpG        | gene                | Z score | p-value    | FDR     |
|------------|---------------------|---------|------------|---------|
| cg25648203 | <i>EXOC3</i>        | -7.34   | 2.11e-13   | 0       |
| cg19089201 | <i>RP4-647J21.1</i> | 5.55    | 2.84e-8    | 0       |
| cg05575921 | <i>EXOC3</i>        | -4.86   | 0.00000119 | 0.00039 |
| cg21161138 | <i>EXOC3</i>        | -3.82   | 0.000133   | 0.0254  |

676

677

678

679

680

681

682

683

684

685

686

687

688

689

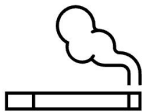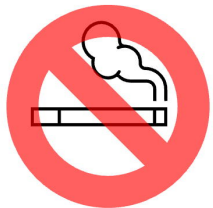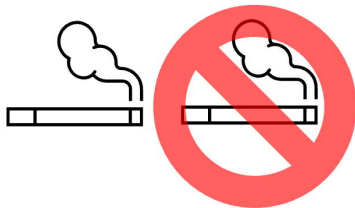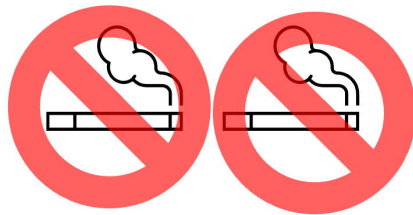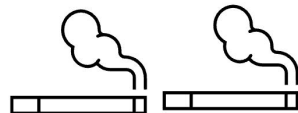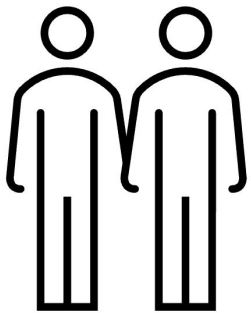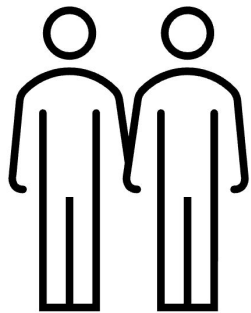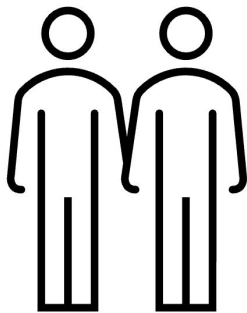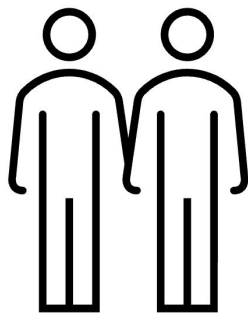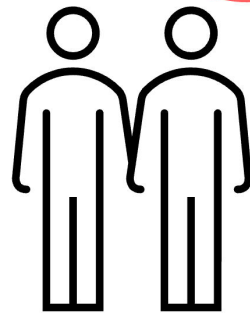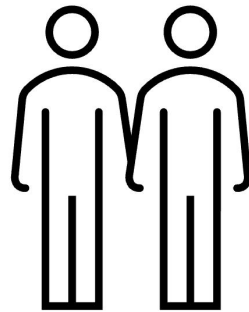

Discordant  
current smoking  
53 twin pairs

Discordant former-  
never smoking  
72 pairs

Discordant current-  
former smoking  
66 pairs

Concordant  
Never smoked  
406 pairs

Concordant former  
smoking  
88 pairs

Concordant  
current smoking  
83 pairs

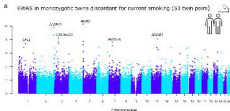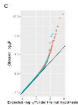

■ CPD < 10 (N=169) (solid blue line) (75% of discordant pairs) (n=40)  
■ CPD > 10 (genome-wide table)

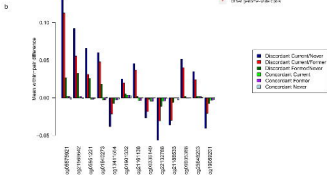

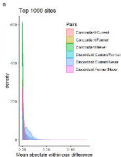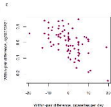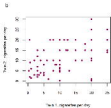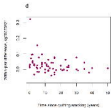

Source: http://biorxiv.org/content/10.1101/2022.08.17.504357v1.full.pdf
